# Supplementary material
Source: publisher site journal article supplement (http://www.spandidos-publications.com/4775/downloadSupplementary)

Figure S1. Immunohistochemical staining of RNF31 in lung cancer cases without *RNF31* Q622H polymorphism. Lung cancer specimen with (A) negative and (B) positive expression of RNF31. Scale bar=100  $\mu$ m. RNF31, RING finger protein 31.

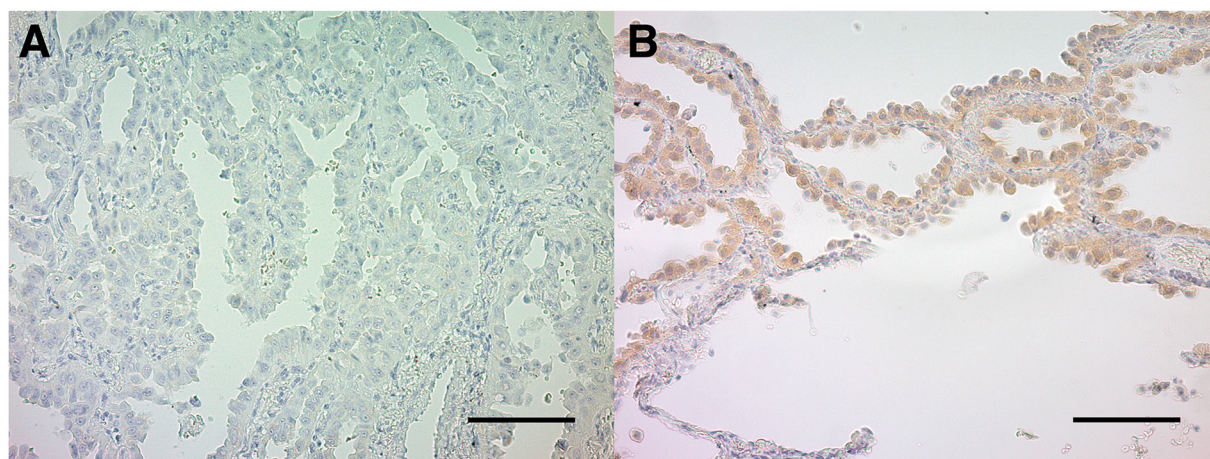

Figure S2. Immunoblot analysis of *RNF31*-KO 293T cells. Immunoblot analysis showed RNF31 protein deficiency in *RNF31*-KO 293T cells. RNF31, RING finger protein 31; KO, knockout.

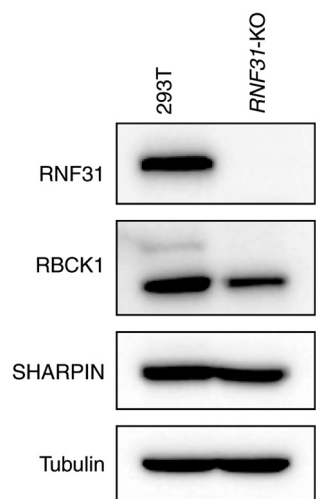

Supplement: Supplementary file 1 [file downloadSupplementary]
